# Supplementary material
Source: PubMed Central journal article supplement (PMC2613452)
Supplement: JCI0937141sd.pdf [file JCI0937141sd.pdf]

**Supplementary Table 1.** Absolute numbers of B, T and NK cells in peripheral blood ( $\times 10^9/l$ ) of the patient at diagnosis, three and six months post-SCT

|          | diagnosis | 3 months post -SCT | 6 months post -SCT | Age matched controls |
|----------|-----------|--------------------|--------------------|----------------------|
| B-cells  | <0.01     | 0.4                | 0.6                | 0.6-2.7              |
| T-cells  | 0.1       | 2.4                | 2.2                | 1.6-6.7              |
| NK cells | 0.4       | 0.4                | 0.1                | 0.2-1.2              |

**Supplementary Table 2.** Analysis of DH-JH coding joints of the patient

| DH gene segment | 3' deletion   | P nucleotides <sup>a</sup> | N nucleotides <sup>b</sup> | P nucleotides | 5' deletion   | JH gene segment |
|-----------------|---------------|----------------------------|----------------------------|---------------|---------------|-----------------|
| DH1-26          | 0             |                            |                            |               | -15/-18       | JH4/JH5         |
| DH2-15          | -3            |                            | CG                         |               | 0             | JH6             |
| DH3-9           | -4            |                            | TGA                        |               | 0             | JH4             |
| DH3-22          | -10           |                            | A                          | A             | 0             | JH3             |
| DH3-22          | -1            |                            | GGG                        |               | -10           | JH4             |
| DH3-22          | 0             |                            | CCT                        |               | 0             | JH3             |
| DH4-17          | 0             |                            | AC                         |               | -9            | JH4             |
| DH4-4           | -11/-14       |                            | TC                         | GT            | 0             | JH4             |
| DH4-17          | -7/-10        |                            | CC                         | AAGTAGT       | 0             | JH4             |
| DH5-5           | 0             | GTAACCA                    |                            | AAGTAGT       | 0             | JH4             |
| DH5-5           | 0             | G                          | CCCGTTACGCC                | T             | 0             | JH6             |
| DH5-24          | -1            |                            | GAAAAGG                    |               | -17           | JH6             |
| DH5-24          | 0             | GTAATTG                    | ACC                        | CAAAGTAGT     | 0             | JH4             |
| DH5-12          | -2            |                            | GGGCCCTATATCCAGATCGG       |               | 0             | JH4             |
| DH6-13          | 0             | GTACCA                     |                            | TAGTAAT       | 0             | JH6             |
| DH6-25          | 0             |                            | CGATATTGG                  |               | -5            | JH6             |
| DH6-13          | -4            |                            | ACC                        |               | -5            | JH6             |
| DH6-19          | 0             |                            | TGGTAGGG                   |               | -7            | JH4             |
| DH6-19          | -1            |                            | AAGTGTCC                   |               | 0             | JH1             |
| DH6-25          | -5            |                            | C                          | CAAAGTAGT     | 0             | JH4             |
| DH6-13          | 0             | G                          |                            |               | -2            | JH6             |
| DH6-13          | 0             | G                          |                            |               | -2            | JH6             |
| DH6-25          | -2            |                            | CACCGCC                    | GT            | 0             | JH4             |
| <b>Average</b>  | -2.2/-<br>2.5 | 1.0                        |                            | 2.0           | -4.7/-<br>5.0 |                 |

<sup>a</sup> P nucleotides, palindromic nucleotides

<sup>b</sup> N nucleotides, non-templated nucleotides
